# Supplementary material for: An ultra-fast UV-electrochemical sensor based on Cu-MOF for highly sensitive and selective detection of ferric ions
Source: Royal Society of Chemistry journal article supplement (doi:10.1039/d2an01865a), 2022-12-09
Supplement: d2an01865a1.pdf [file d2an01865a1.pdf]

## Supporting Information

### 1. Chemicals and instrumentation

Copper(II) chloride dehydrate ( $\text{CuCl}_2 \cdot 2\text{H}_2\text{O}$ , 99%), 2,5-dicarboxylic acid-3,4-ethylene dioxythiophene ( $\text{H}_2\text{L}$ , >95%), N,N-dimethylacetamide (DMA, >99%), N,N-dimethylformamide (DMF, >99%) were purchased from commercial suppliers (aladdin-reagent, TCL-reagent and macklin-reagent) and were used as received without further purification. All solutions were prepared with ultrapure water. The phases were analyzed by X-ray powder diffraction (XRD) using a D/Max-2500 X-ray diffractometer with Cu  $K\alpha$  radiation. The FT-IR spectra were measured with a Bruker Tensor 27 spectrophotometer on KBr disks. TGA experiment was performed on a NETZSCH TG 209 instrument with a heating rate of  $10\text{ }^\circ\text{C min}^{-1}$ . Ultraviolet-visible (UV-Vis) spectra were recorded on a Hitachi U-3900 spectrometer. A PO-120 quartz cuvette (10 mm) was purchased from Shanghai Huamei Experiment Instrument Plants, China. The ultrasonic process was handled with an ultrasonic cleaning machine (Elma, S100H). All electrochemical experiments were performed by a Chi660e electrochemical workstation (China). All the studies were carried out at room temperature and under nitrogen surroundings. For the pH measurements a pH meter with a combined glass electrode was used. Ultra-pure water (ulup,  $18.2\text{ M}\Omega\text{ cm}$ ,  $25\text{ }^\circ\text{C}$ ) was used to prepare all electrolyte solutions.

### 2. General measurements

Prior to be used, a glass carbon electrode (GCE,  $\Phi = 1\text{ mm}$ ) was carefully polished

with an alumina slurry (0.5  $\mu\text{m}$  particle size) until a mirror-like surface was obtained, then rinsed ultrasonically with ultrapure water, nitric acid (1:1, v/v), sodium hydroxide (0.1  $\text{mol}\cdot\text{L}^{-1}$ ) and ethanol in turn to remove any alumina residue from the electrode surface.

Diffraction intensity data for single crystals of **Cu-1** and **Cu-2** was collected on a Agilent Technologies SuperNova Single Crystal Diffractometer at 293 (2) K equipped with graphite-monochromatic Mo  $K\alpha$  radiation ( $\lambda = 0.71073 \text{ \AA}$ ). The structures were solved by SHELXS (direct methods) and refined by SHELXL<sup>[1]</sup> (full matrix least-squares techniques) in the Olex2 package<sup>[2]</sup>.

### 3. Direct synthesis of $\{[\text{CuL}(\text{DMF})]\cdot\text{MeCN}\}_n(\text{Cu-2})$

A mixture of 34.10 mg (0.2 mmol)  $\text{CuCl}_2\cdot 2\text{H}_2\text{O}$  and 46.04 mg (0.2 mmol)  $\text{H}_2\text{L}$  was dissolved in a mixture of 5 mL DMF, 5 mL DMA, 5 mL  $\text{H}_2\text{O}$  and 5 mL acetonitrile, and then heated for 2 days at 90  $^\circ\text{C}$  in a Parr Teflon-lined stainless steel vessel (23 mL), then cooled to room temperature slowly in 2 days. Dark Green diamond-like crystals of **Cu-2** were collected at the bottom of the glass vessel. Yield: 77.1 mg (75.8 %). Anal. Calc for  $\text{C}_{13}\text{H}_{14}\text{CuN}_2\text{O}_7\text{S}$ . C, 38.47; H, 3.48 (%); Found: C, 38.62; IR (KBr disk/ $\text{cm}^{-1}$ ) 3323.66 m, 2961.15 m, 1603.28 s, 1451.22 m, 1387.15 s, 1350.26 s, 1200.57 w, 1100.17 s, 848.01 w, 793.57 w, 734.69 w, 538.48 w.

**Table S1.** Crystal data and structure refinements for **Cu-1** and **Cu-2**

|                                                  | <b>Cu-1</b>                                      | <b>Cu-2</b>                                                       |
|--------------------------------------------------|--------------------------------------------------|-------------------------------------------------------------------|
| Formula                                          | C <sub>8</sub> H <sub>6</sub> CuO <sub>7</sub> S | C <sub>13</sub> H <sub>14</sub> CuN <sub>2</sub> O <sub>7</sub> S |
| M, g mol <sup>-1</sup>                           | 309.72                                           | 405.87                                                            |
| Temp (K)                                         | 123(2)                                           | 123(2)                                                            |
| Cryst. syst.                                     | tetragonal                                       | monoclinic                                                        |
| space group                                      | <i>Cmm2</i>                                      | <i>P2<sub>1</sub>/n</i>                                           |
| <i>a</i> / Å                                     | 28.034 (3)                                       | 10.7512(4)                                                        |
| <i>b</i> / Å                                     | 28.097 (3)                                       | 13.6515(6)                                                        |
| <i>c</i> / Å                                     | 7.6489 (8)                                       | 10.9769(5)                                                        |
| $\alpha$ / deg                                   | 90                                               | 90                                                                |
| $\beta$ / deg                                    | 90                                               | 94.102(4)                                                         |
| $\gamma$ / deg                                   | 90                                               | 90                                                                |
| <i>V</i> / Å <sup>3</sup>                        | 6025.0 (12)                                      | 1606.96(11)                                                       |
| <i>Z</i>                                         | 8                                                | 4                                                                 |
| GOF                                              | 1.168                                            | 1.041                                                             |
| reflns collected                                 | 2480                                             | 2927                                                              |
| unique reflns                                    | 2488                                             | 6188                                                              |
| <i>R</i> 1 [ <i>I</i> > 2 $\sigma$ ( <i>I</i> )] | 0.0756                                           | 0.035                                                             |
| <i>wR</i> 2 (all data)                           | 0.2378                                           | 0.0825                                                            |
| CCDC number                                      | 2175361                                          | 2175362                                                           |

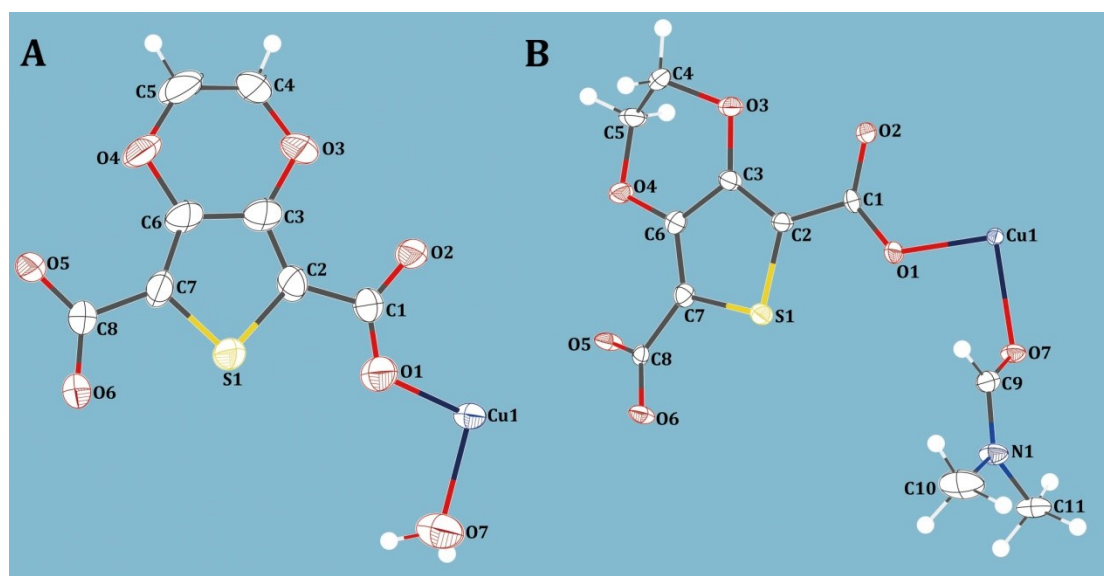

Fig.S1 (A) thermal ellipsoid diagram of **Cu-1**; (B) thermal ellipsoid diagram of **Cu-2**(without solvent molecule).

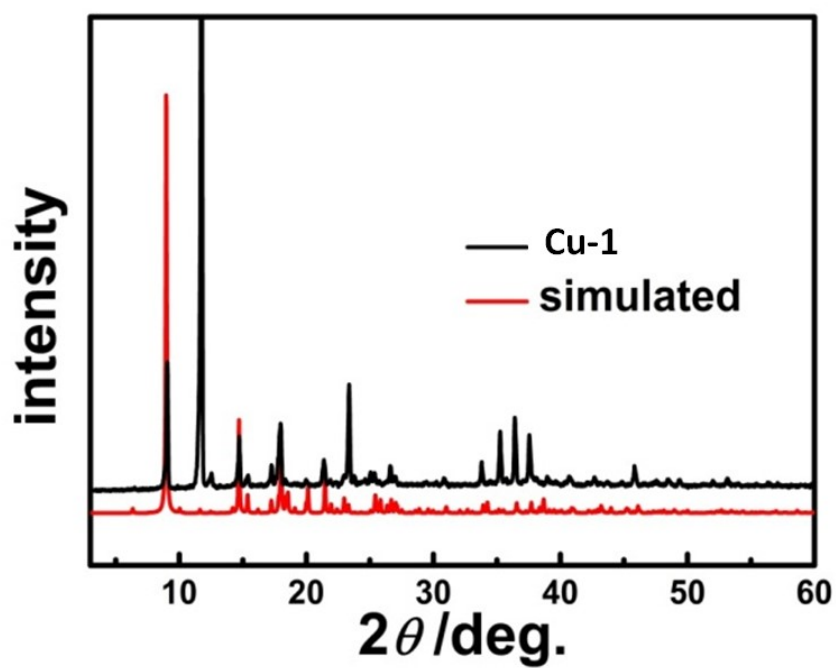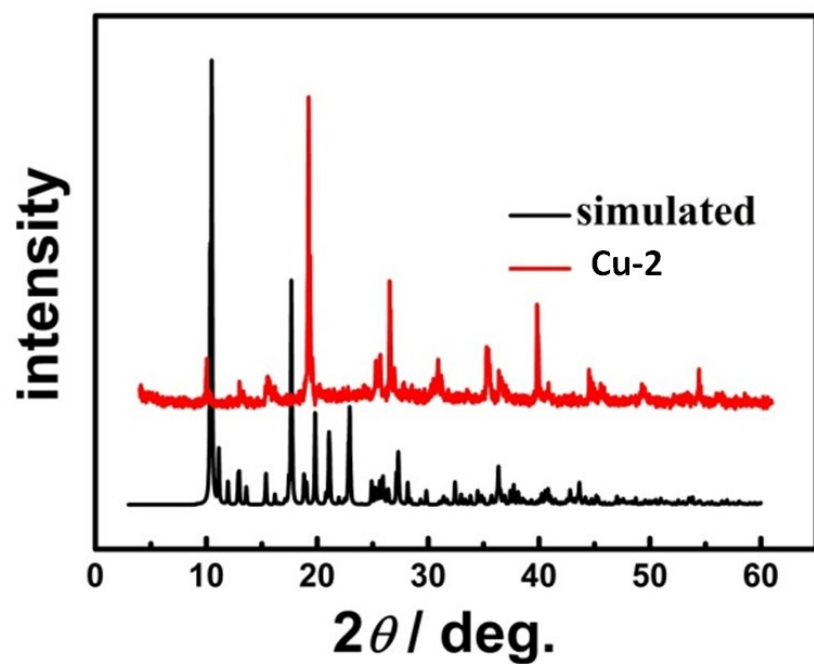

Fig. S2 PXRD patterns of Cu-1 or Cu-2 compare with the simulated one from single-crystal data of Cu-1 or Cu-2, respectively.

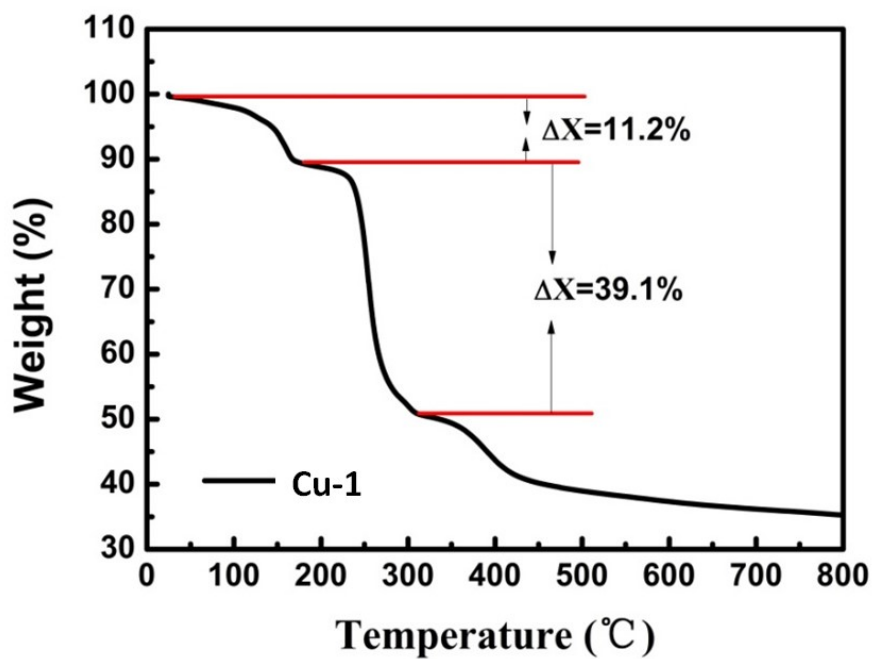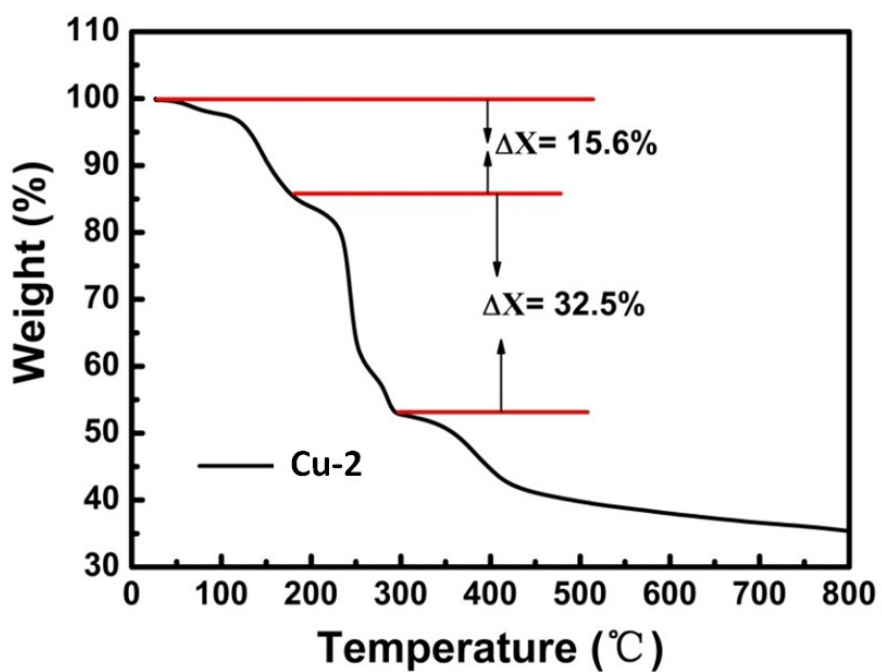

Figure S3. Thermal gravimetric analyses (TGA) of Cu-1 and Cu-2.

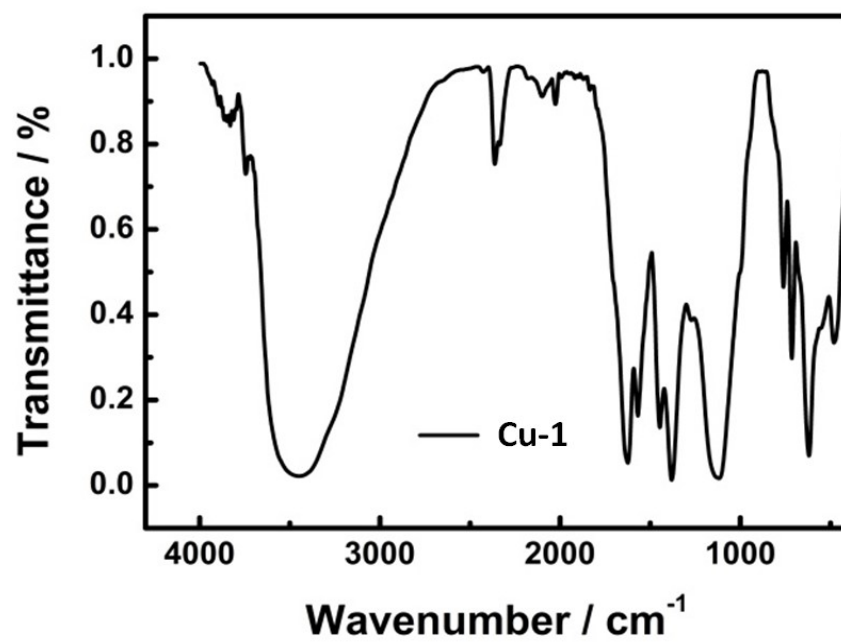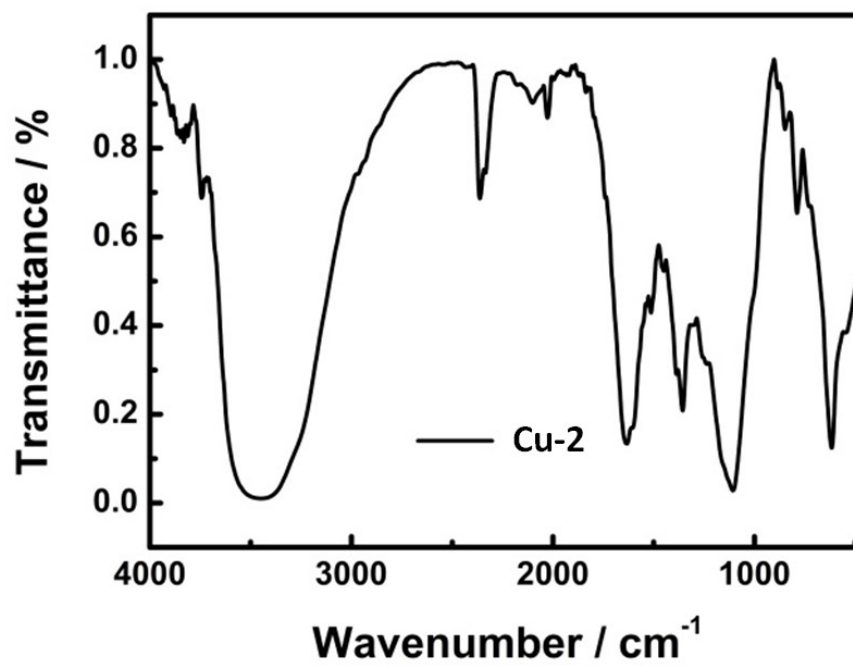

Fig. S4. IR data for Cu-1 and Cu-2.

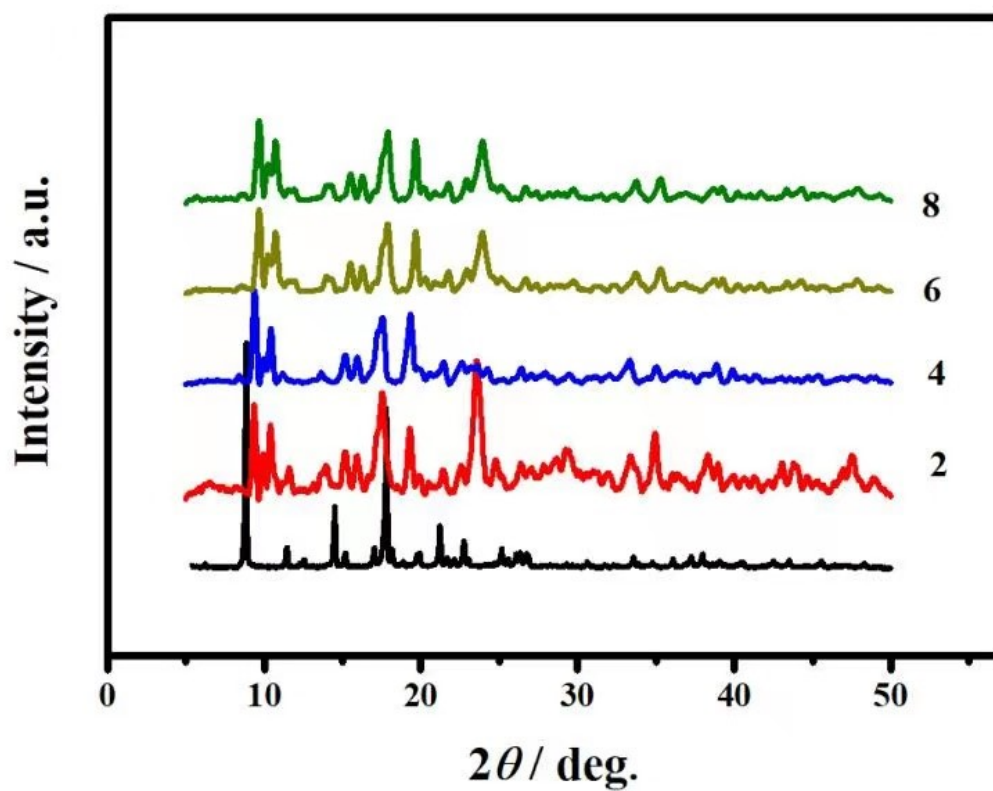

Fig. S5 PXRD diagram of Cu-1 after immersing in different pH solution

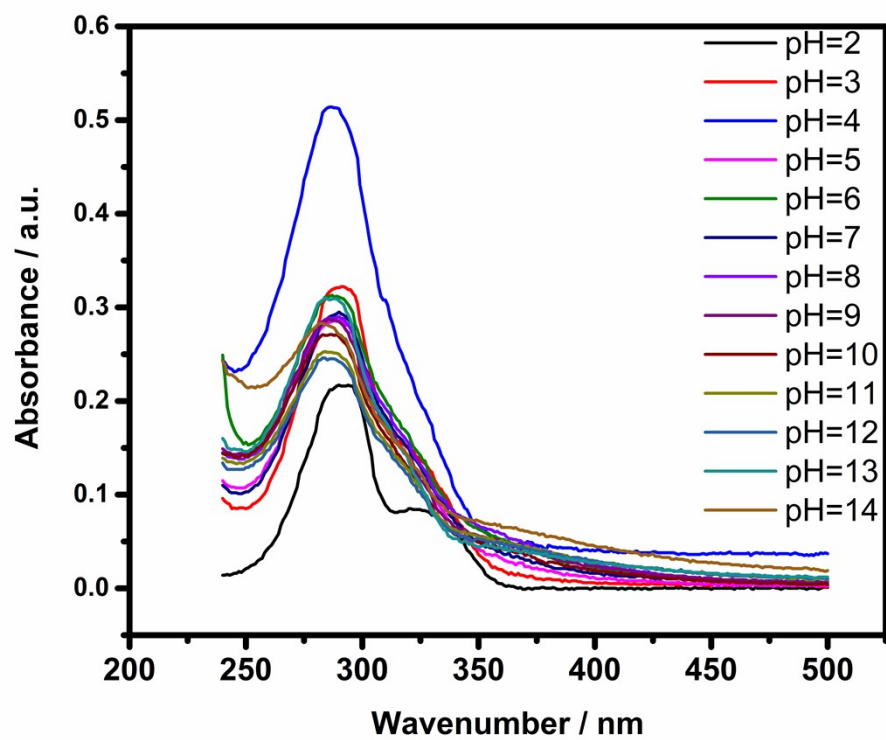

**Fig. S6.** UV spectra of Cu-1 in different pH aqueous solution



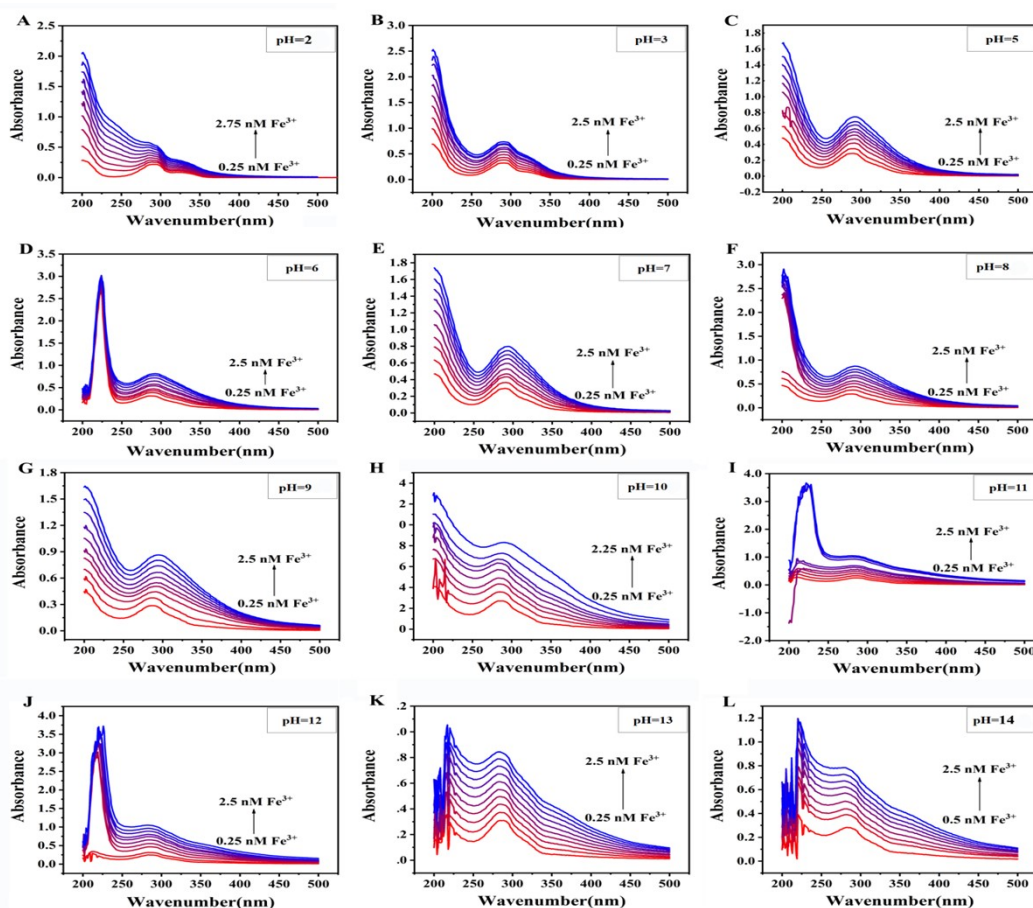

**Fig. S7.** UV spectra of Cu-1 in different pH aqueous solution for detecting  $\text{Fe}^{3+}$ : (A) pH=2, concentration range 0.25~2.75 nmol/L; (B) pH=3, concentration range 0.25~2.5 nmol/L; (C) pH=5, concentration range 0.25~2.5 nmol/L; (D) pH=6, concentration range 0.25~2.5 nmol/L; (E) pH=7, concentration range 0.25~2.75 nmol/L; (F) pH=8, concentration range 0.25~2.75 nmol/L; (G) pH=9, concentration range 0.25~2.5 nmol/L; (H) pH=10, concentration range 0.25~2.25 nmol/L; (I) pH=11, concentration range 0.25~2.75 nmol/L; (J) pH=12, concentration range 0.25~2.75 nmol/L; (K) pH=13, concentration range 0.25~2.75 nmol/L; (L) pH=14, concentration range 0.5~2.5 nmol/L.

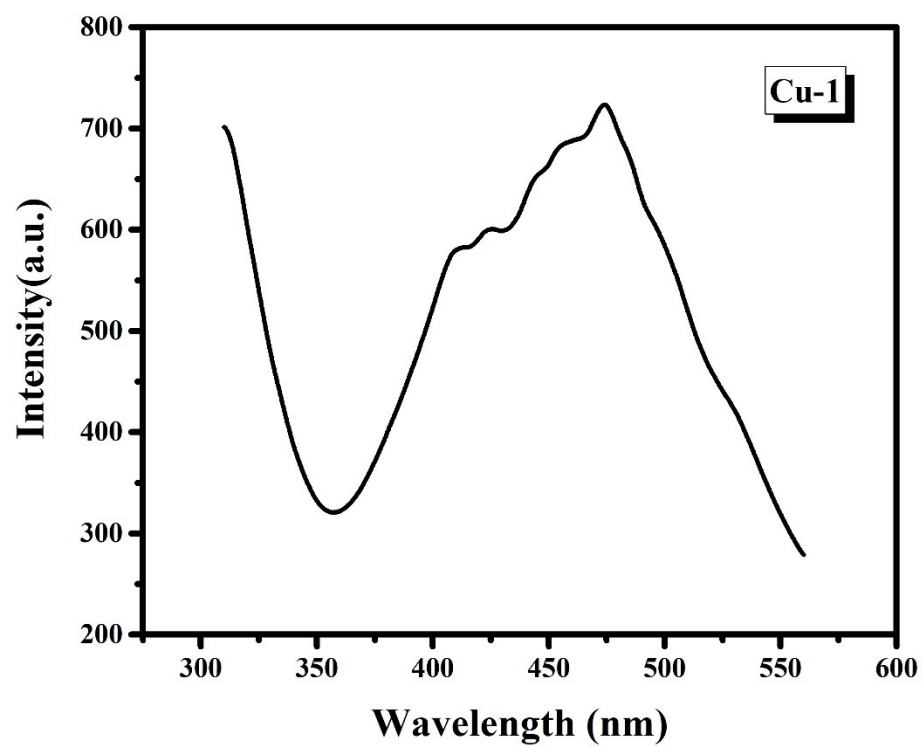

**Fig. S8.** The solid-state fluorescence spectra of **Cu-1** at room temperature.

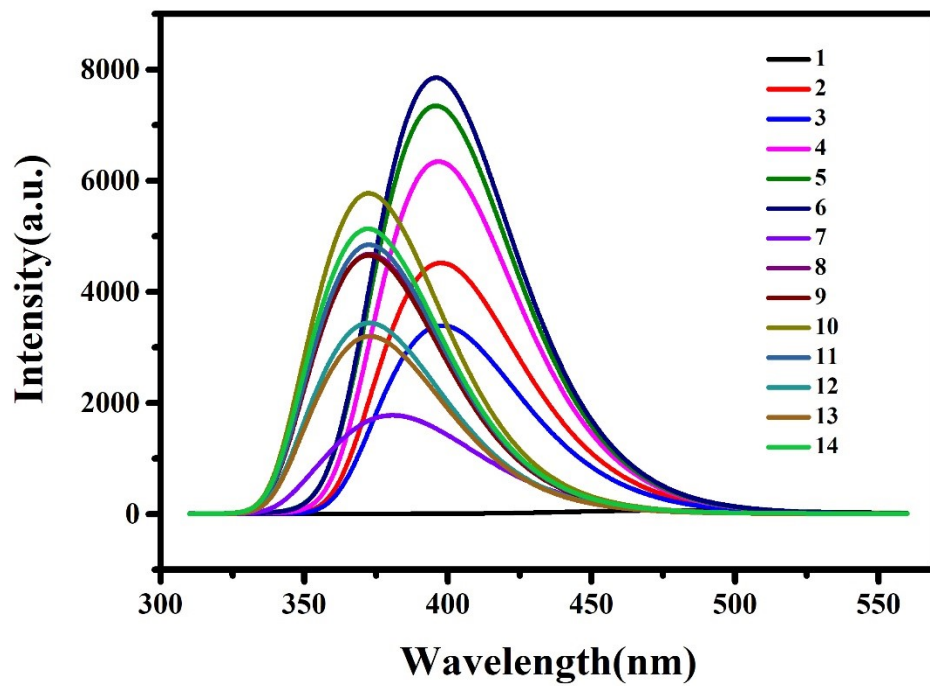

**Fig. S9.** Fluorescence spectra of Cu-1 in different pH aqueous solution.

Table S2. ICP-MS results of **Cu-1** and **Cu-1@Fe**.

|         | Cu content(mmol/g) | Fe content(mmol/g) | Cu:Fe(molar ratio) |
|---------|--------------------|--------------------|--------------------|
| Cu-1    | 5040.257871        | 82.55161996        | 61.05583238        |
| Cu-1@Fe | 659.6489779        | 4003.072212        | 0.16478568         |

<sup>[1]</sup>O.V. Dolomanov, L.J. Bourhis, R.J. Gildea, J.A.K. Howard and H. Puschmann, *J.*

*Appl. Cryst.*, 2009, **42**, 339-341.

<sup>[2]</sup>G. Sheldrick, *Acta Cryst.*, 2008, **A64**, 112-122.
